# Supplementary material
Source: publisher figshare collection journal article supplement (https://acs.figshare.com/ndownloader/files/4103203)
Supplement: Supplementary file 1 [file 4103203]

# Supporting Information

## From Selective $\alpha 4\beta 2$ Nicotinic Acetylcholine Receptor Ligands to the Discovery of Selective Sigma-1 Receptor Ligands: Pharmacophore Analysis and Rational Design

*Li-Fang Yu,<sup>†</sup> Han-Kun Zhang,<sup>†</sup> Hendra Gunosewoyo,<sup>†</sup> Alan P. Kozikowski<sup>\*,†</sup>*

<sup>†</sup>Drug Discovery Program, Department of Medicinal Chemistry and Pharmacognosy, University of Illinois  
at Chicago, 833 South Wood Street, Chicago, Illinois 60612, United States

Phone: +1-312-996-7577; fax: +1-312-996-7107 ; e-mail: [kozikowa@uic.edu](mailto:kozikowa@uic.edu).

**Abbreviations:** CC, column chromatography; rt, room temperature; TFA, trifluoroacetic acid.

### List of contents

|                                  |    |
|----------------------------------|----|
| Synthetic Methods and Procedures | S2 |
| <i>In Vitro</i> Binding Studies  | S5 |

## Synthetic Methods and Procedures

**General Methods.** Starting materials, reagents, and solvents were purchased from commercial suppliers and used without further purification, unless otherwise stated. Anhydrous THF and CH<sub>2</sub>Cl<sub>2</sub> were obtained by distillation over sodium wire or CaH<sub>2</sub>, respectively. All non-aqueous reactions were run under an argon atmosphere with exclusion of moisture from reagents, and all reaction vessels were oven-dried. The progress of reactions was monitored by TLC on SiO<sub>2</sub>. Spots were visualized by their quenching of the fluorescence of an indicator admixed to the SiO<sub>2</sub> layer, or by dipping into KMnO<sub>4</sub> solution followed by heating. SiO<sub>2</sub> for column chromatography (CC) was of 230–400 mesh particle size, and an EtOAc/hexane mixture or gradient was used unless stated otherwise. <sup>1</sup>H NMR spectra were recorded at a spectrometer frequency of 300 or 400 MHz, <sup>13</sup>C NMR spectra at 75 MHz or 100 MHz. <sup>1</sup>H chemical shifts are reported in δ (ppm) using the δ 7.26 signal of CDCl<sub>3</sub> or the δ 4.80 signal of D<sub>2</sub>O as internal standard. <sup>13</sup>C chemical shifts are reported in δ (ppm) using the δ 77.23 signal of CDCl<sub>3</sub> as internal standard. <sup>13</sup>C NMR spectra in D<sub>2</sub>O were not adjusted. Purities of final compounds (>98%) were established by analytical HPLC, which was carried out on an Agilent 1100 HPLC system with a Synergi 4 μ Hydro-RP 80A column, with detection at 220 or 254 nm on a variable wavelength detector G1314A; flow 1.4 mL/min; gradient of 10% to 100% methanol in water (both containing 0.05 vol% of TFA) in 18 min.

**3-[[3-(2(*S*)-Azetidinylmethoxy)isoxazol-5-yl]methoxy]-5-chloropyridine (14):** To a solution of the *N*-Boc protected precursor **23** (200 mg, 0.51 mmol) in CH<sub>2</sub>Cl<sub>2</sub> (10 mL) was added TFA (0.5 mL) under argon with ice cooling. The mixture was stirred overnight at rt. After the solvent was evaporated, the residue was dissolved in distilled water (5 mL). The solution was filtered over a syringe filter (polytetrafluoroethylene, 17 mm diameter, 0.45 μm pore size), then concentrated to 2–3 mL under reduced pressure at 30 °C bath temperature. The crude product was purified by preparative HPLC under the following conditions: column, ACE AQ, 150 x 21.2 mm; flow, 17 mL/min; all solvents containing 0.05 vol% TFA; UV detection at 254 nm and 220 nm; Gradient: 25–100% MeOH in water in 30 min, 100% for 5 min, return to 25% in 4 min, and equilibration at 25% for 1 min. After the solvent was

evaporated, the residue was dissolved in distilled water (about 2–3 mL). The solution was lyophilized to obtain the TFA salt (150 mg, 66%) as a white solid. Purity ~100%.  $[\alpha]_D^{20}$  0.7 ( $c = 0.84$ , MeOH).  $^1\text{H}$  NMR (400 MHz,  $\text{D}_2\text{O}$ )  $\delta$  8.34 (m, 2H), 7.90 (d, 1H,  $J = 2.0$  Hz), 6.37 (s, 1H), 5.28 (s, 2H), 4.94–4.92 (m, 1H), 4.55–4.53 (m, 2H), 4.15–4.10 (m, 1H), 4.06–4.02 (m, 1H), 2.69–2.62 (m, 2H).  $^{13}\text{C}$  NMR (100 MHz,  $\text{D}_2\text{O}$ )  $\delta$  170.8, 167.1, 162.4 (TFA), 154.9, 137.1, 133.6, 131.8, 126.9, 115.7 (TFA), 95.7, 67.7, 61.6, 58.4, 43.1, 19.9. Anal Calcd for  $\text{C}_{13}\text{H}_{14}\text{ClN}_3\text{O}_3 \cdot 1.25 \text{ C}_2\text{HF}_3\text{O}_2 \cdot 0.7 \text{ H}_2\text{O}$  (MW 453.4): C, 41.29; H, 3.72; F, 15.80; N, 9.32. Found: C, 41.08; H, 3.43; F, 15.62; N, 9.06.

**5-(Phenoxymethyl)-3-(2(*S*)-pyrrolidinylmethoxy)isoxazole (15).** To a solution of the *N*-Boc protected precursor **24** (180 mg, 0.48 mmol) in  $\text{CH}_2\text{Cl}_2$  (10 mL) was added TFA (0.5 mL) under argon with ice cooling. The mixture was stirred overnight at rt. After the solvent was evaporated, the residue was dissolved in distilled water (5 mL). The solution was filtered over a syringe filter (polytetrafluoroethylene, 17 mm diameter, 0.45  $\mu\text{m}$  pore size), then concentrated to 2–3 mL under reduced pressure at 30 °C bath temperature. The crude product was purified by preparative HPLC under the following conditions: column, ACE AQ, 150 x 21.2 mm; flow, 17 mL/min; all solvents containing 0.05 vol% TFA; UV detection at 254 nm and 220 nm; gradient: 8–100% MeOH in water in 30 min, 100% for 5 min, return to 8% in 4 min, and equilibration at 8% for 1 min. After the solvent was evaporated, the residue was dissolved in distilled water (2–3 mL). The solution was lyophilized to obtain the TFA salt (71 mg, 37%) as a white solid. Purity 99.3%.  $[\alpha]_D^{20}$  11.7 ( $c = 0.50$ , MeOH).  $^1\text{H}$  NMR (300 MHz,  $\text{D}_2\text{O}$ )  $\delta$  7.16–7.10 (m, 2H), 6.84–6.81 (m, 3H), 6.05 (s, 1H), 4.94 (s, 2H), 4.39 (dd, 1H,  $J = 11.4, 3.3$  Hz), 4.22 (dd, 1H,  $J = 11.4, 8.4$  Hz), 3.22–3.16 (m, 2H), 2.09–1.65 (m, 4H).  $^{13}\text{C}$  NMR (75 MHz,  $\text{D}_2\text{O}$ )  $\delta$  172.4, 171.2, 162.4 (TFA), 159.2, 130.6, 122.8, 115.8, 115.7 (TFA), 95.8, 69.3, 62.1, 59.9, 46.8, 27.2, 24.7. Anal Calcd for  $\text{C}_{15}\text{H}_{18}\text{N}_2\text{O}_3 \cdot 1.1 \text{ C}_2\text{HF}_3\text{O}_2 \cdot 0.05 \text{ H}_2\text{O}$  (MW 400.6): C, 51.56; H, 4.83; F, 15.65; N, 6.99. Found: C, 51.39; H, 4.81; F, 15.86; N, 7.11.

**3-[[1-(*tert*-Butoxycarbonyl)-2(*S*)-pyrrolidinyl]methoxy]isoxazol-5-ylmethanol (18).** To a stirred solution of 1-(*tert*-butoxycarbonyl)-2(*S*)-pyrrolidinylmethanol (240 mg, 1.7 mmol), 3-hydroxyisoxazole-

5-carboxylic acid methyl ester (**16**; 406 mg, 2.0 mmol), and PPh<sub>3</sub> (660 mg, 2.5 mmol) in anhydrous THF (30 mL) was added dropwise diethyl azodicarboxylate (1.5 mmol). After stirring overnight at rt, the solvent was evaporated, and the residue was dissolved in EtOAc. The solution was washed with water (20 mL) and brine (15 mL), dried over Na<sub>2</sub>SO<sub>4</sub>, filtered, and concentrated under vacuum. The residue was purified by CC on SiO<sub>2</sub> to give the isoxazolecarboxylic acid ester. To a solution of this ester in anhydrous THF (20 mL) was added LiBH<sub>4</sub> (150 mg, 4 mmol) with ice cooling under Ar. After stirring overnight at rt, saturated aqueous NH<sub>4</sub>Cl solution was added with ice cooling. Extraction with EtOAc, drying over Na<sub>2</sub>SO<sub>4</sub>, and CC on SiO<sub>2</sub> gave the alcohol **18** (385 mg, 78%) as a colorless oil. <sup>1</sup>H NMR (400 MHz, CDCl<sub>3</sub>) δ 5.86 (s, 1H), 4.58 (s, 2H), 4.26 (m, 1H), 4.16–4.10 (m, 2H), 3.66 (br, 1H), 3.35 (m, 2H), 1.94–1.79 (m, 4H), 1.42 (s, 9H).

**2(S)-[[5-(Iodomethyl)isoxazol-3-yloxy]methyl]azetidine-1-carboxylic Acid *tert*-Butyl Ester (19).** To a stirred solution of **17** (270 mg, 0.95 mmol), imidazole (142 mg, 2.1 mmol), and PPh<sub>3</sub> (500 mg, 1.9 mmol) in anhydrous CH<sub>2</sub>Cl<sub>2</sub> (20 mL) was added I<sub>2</sub> (482 mg, 1.9 mmol) with ice cooling under Ar. After stirring overnight at rt, the solvent was evaporated. The residue was purified by CC on SiO<sub>2</sub> to give the iodide (290 mg, 77%) as a colorless oil. <sup>1</sup>H NMR (400 MHz, CDCl<sub>3</sub>) δ 5.92 (s, 1H), 4.47–4.42 (m, 2H), 4.27–4.22 (m, 3H), 3.79 (t, 2H, *J* = 7.6 Hz), 2.30–2.22 (m, 1H), 2.19–2.10 (m, 1H), 1.36 (s, 9H). <sup>13</sup>C NMR (100 MHz, CDCl<sub>3</sub>) δ 171.9, 169.5, 156.1, 94.1, 79.7, 70.1, 60.0, 46.7, 28.4, 18.8.

**2(S)-[[5-(Iodomethyl)isoxazol-3-yloxy]methyl]pyrrolidine-1-carboxylic Acid *tert*-Butyl Ester (20).** To a stirred solution of **18** (240 mg, 0.8 mmol), imidazole (83 mg, 1.2 mmol), and PPh<sub>3</sub> (320 mg, 1.2 mmol) in anhydrous PhMe (8 mL) was added I<sub>2</sub> (308 mg, 1.2 mmol) with ice cooling under Ar. After stirring overnight at rt, the solvent was evaporated. The residue was purified by CC on SiO<sub>2</sub> to give the iodide (240 mg, 73%) as a pale-yellow solid. <sup>1</sup>H NMR (300 MHz, CDCl<sub>3</sub>) δ 5.92 (s, 1H), 4.30–4.25 (m, 3H), 4.16–4.11 (m, 2H), 3.36 (s, 2H), 1.96–1.80 (m, 4H), 1.45 (s, 9H).

**2(S)-[[5-[(5-Chloropyridin-3-yloxy)methyl]isoxazol-3-yloxy]methyl]azetidine-1-carboxylic Acid *tert*-Butyl Ester (21).** To a stirred solution of **19** (250 mg, 0.6 mmol) and 5-chloropyridin-3-ol (120 mg, 0.8

mmol) in anhydrous DMF (5 mL) was added K<sub>2</sub>CO<sub>3</sub> (522 mg, 3.8 mmol) under Ar. After stirring overnight at rt, saturated aqueous NH<sub>4</sub>Cl solution was added. The mixture was extracted with EtOAc (2 × 15 mL), and the combined organic phases were washed with water (3 × 10 mL), dried over Na<sub>2</sub>SO<sub>4</sub>, and evaporated. The residue was purified by CC on SiO<sub>2</sub> to give the product (200 mg, 88%) as a colorless oil. <sup>1</sup>H NMR (400 MHz, CDCl<sub>3</sub>) δ 8.17 (s, 1H), 8.15 (s, 1H), 7.22 (s, 1H), 5.99 (s, 1H), 5.02 (s, 2H), 4.46–4.42 (m, 2H), 4.25 (d, 1H, *J* = 10.0 Hz), 3.77 (t, 2H, *J* = 7.6 Hz), 2.28–2.20 (m, 1H), 2.17–2.10 (m, 1H), 1.33 (s, 9H). <sup>13</sup>C NMR (100 MHz, CDCl<sub>3</sub>) δ 171.8, 167.2, 156.1, 154.1, 141.9, 136.2, 132.0, 121.7, 95.6, 79.7, 70.2, 61.9, 59.9, 46.8, 29.6, 28.3, 18.8.

**2(*S*)-[[5-(Phenoxymethyl)isoxazol-3-yloxy]methyl]pyrrolidine-1-carboxylic Acid *tert*-Butyl Ester (22).** To a stirred solution of **20** (220 mg, 0.54 mmol) and phenol (101 mg, 1.1 mmol) in anhydrous DMF (4 mL) was added K<sub>2</sub>CO<sub>3</sub> (450 mg, 3.3 mmol) under Ar. After stirring overnight at rt, saturated aqueous NH<sub>4</sub>Cl solution was added. The mixture was extracted with EtOAc (2 × 15 mL), and the combined organic phases were washed with water (3 × 10 mL), dried over anhydrous Na<sub>2</sub>SO<sub>4</sub>, and evaporated. The residue was purified by CC on SiO<sub>2</sub> to give the product (180 mg, 89%) as a white solid. <sup>1</sup>H NMR (300 MHz, CDCl<sub>3</sub>) δ 7.31 (t, 2H, *J* = 7.5 Hz), 7.01 (t, 2H, *J* = 7.5 Hz), 6.94 (d, 2H, *J* = 9.0 Hz), 5.97 (s, 1H), 5.04 (s, 2H), 4.33 (m, 1H), 4.16 (m, 2H), 3.37 (m, 2H), 1.97–1.86 (m, 4H), 1.46 (s, 9H).

***In vitro* Binding Studies.** Radioligand competition studies and broad-range screening were carried out by the National Institute of Mental Health's Psychoactive Drug Screening Program, Contract # HHSN-271-2008-00025-C (NIMH PDSP). For experimental details please refer to the PDSP website <http://pdsp.med.unc.edu/>.
